# Supplementary material for: A universal green approach for the synthesis of NPS-codoped carbon quantum dots with enhanced broad-spectrum antibacterial and antioxidant activities
Source: Royal Society of Chemistry journal article supplement (doi:10.1039/d2ra08103b), 2023-01-01
Supplement: d2ra08103b1.pdf [file d2ra08103b1.pdf]

## Electronic Supplementary Information (ESI)

### **A universal green approach for the synthesis of NPS-codoped carbon quantum dots with enhanced broad-spectrum antibacterial and antioxidant activities**

Megha Pant,<sup>1</sup> Suresh kumar,<sup>1</sup> Kumari Kiran,<sup>1</sup> Narendra Singh Bisht,<sup>2</sup> Veena Pande<sup>1</sup> and Anirban Dandapat<sup>3\*</sup>

<sup>1</sup>*Department of Biotechnology, Sir J. C. Bose Technical Campus, Bhimtal, Kumaun University, Nainital, Uttarakhand- 263136*

<sup>2</sup>*Department of Chemistry, DSB Campus, Kumaun University, Nainital, Uttarakhand- 263002*

<sup>3</sup>*University School of Automation and Robotics, Guru Gobind Singh Indraprastha University, East Delhi Campus, Surajmal Vihar, Delhi-110092.*

\*Corresponding author email: [dranirbandandapat@kunainital.ac.in](mailto:dranirbandandapat@kunainital.ac.in)

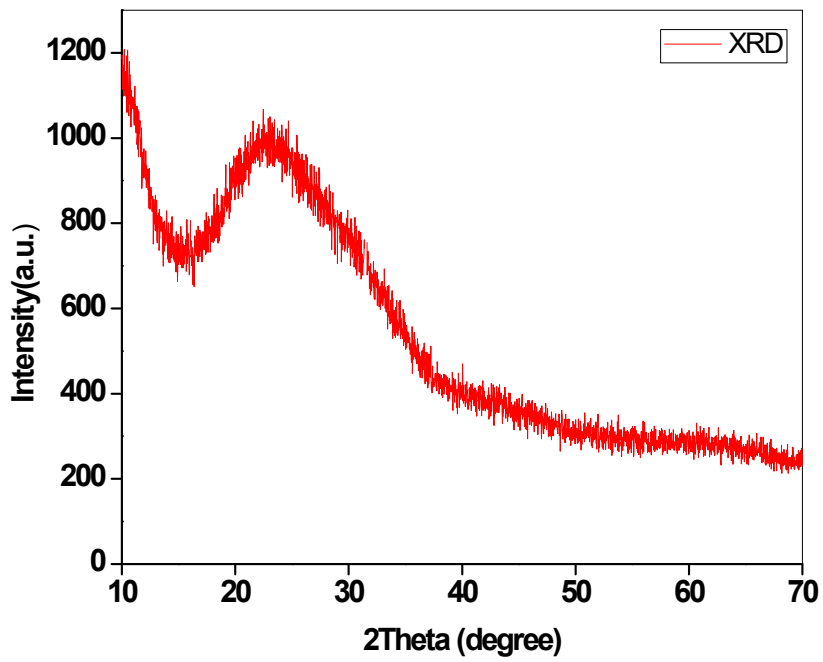

**Fig. S1:** XRD pattern of the synthesized NPS-codoped CQDs.

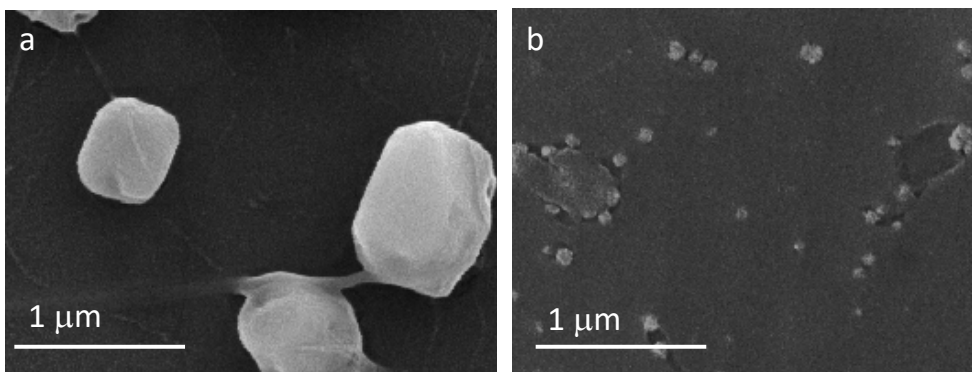

**Fig. S2:** SEM images of bacteria (a) before and (b) after CQDs treatment.

**Table S1:** EC50 of different CQDs compared with our work

| Carbon dots                             | Method of synthesis | EC50 ( $\mu\text{g/ml}$ ) | References    |
|-----------------------------------------|---------------------|---------------------------|---------------|
| F&Cl doped CQDs                         | Hydrothermal        | 50 $\mu\text{g/ml}$       | 1             |
| Citric acid and glutathione derived CDs | Hydrothermal        | 160 $\mu\text{g/ml}$      | 2             |
| Coconut husk CDS                        | Hydrothermal        | 60 $\mu\text{g/ml}$       | 3             |
| <i>Carica</i> Papaya leaves based CDs   | Hydrothermal        | 27.6 $\mu\text{g/ml}$     | 4             |
| Glucose and lysine based CDs            | -                   | 570 $\mu\text{g/ml}$      | 5             |
| Turmeric derived CDs                    | Hydrothermal        | 100 $\mu\text{g/ml}$      | 6             |
| N-S co-doped CDs                        | Hydrothermal        | 300 $\mu\text{g/ml}$      | 7             |
| Endophytic Bacteria-derived CQDs        | Hydrothermal        | 24.78 $\mu\text{g/ml}$    | Present work* |

**References:**

1. Z.M. Markovic, M. Labudova, M. Danko, D. Matijasevic, M. Micusik, V. B.M. Todorović Marković, *ACS Sustainable Chemistry & Engineering*, 2020, 8, 16327-16338.
2. H. Wang M. Zhang Y. Ma, B. Wang, H. Huang, Y. Liu, Z. Kang, *ACS Appl. Mater. Interfaces*, 2020, 12, 41088-95.
3. L.A. Chunduri, A. Kurdekar, S. Patnaik, B.V. Dev, T.M. Rattan, V. Kamisetti, *Materials Focus*, 2016, 5, 55-61.
4. K. Gudimella Kanthi, G. Gedda, P.S. Kumar, B.K. Babu, B. Yamajala, B.V. Rao, A. Sharma, *Environmental Research*, 2022, 204, 111854.
5. D. Li, X. Na, H. Wang, Y. Xie, S. Cong, Y. Song, M. Tan *Journal of agricultural and food chemistry*, 2018 66,1569-1575.
6. S.Roy, P. Ezati, J.W. Rhim, R. Molaei, *Journal of Materials Science*, 2022, 57, 2941-2952.
7. J. Shen, S. Shang, X.Chen, D. Wang, Y. Cai, *Sensors and Actuators B: Chemical*, 2017, 248, 92-100.
